# Supplementary material for: Integration of the Vegetation Phenology Module Improves Ecohydrological Simulation by the SWAT-Carbon Model
Source: Copernicus journal article supplement (doi:10.5194/hess-2024-75), 2024-05-13
Supplement: Supplementary file 1 [file hess-2024-75-supplement.pdf]

1

## **Supplementary Information for**

2

## **Integration of the Vegetation Phenology Module Improves**

3

## **Ecohydrological Simulation by the SWAT-Carbon Model**

4

### **Contents of this file**

5

Figures S1to S3

6

Tables S1 to S3

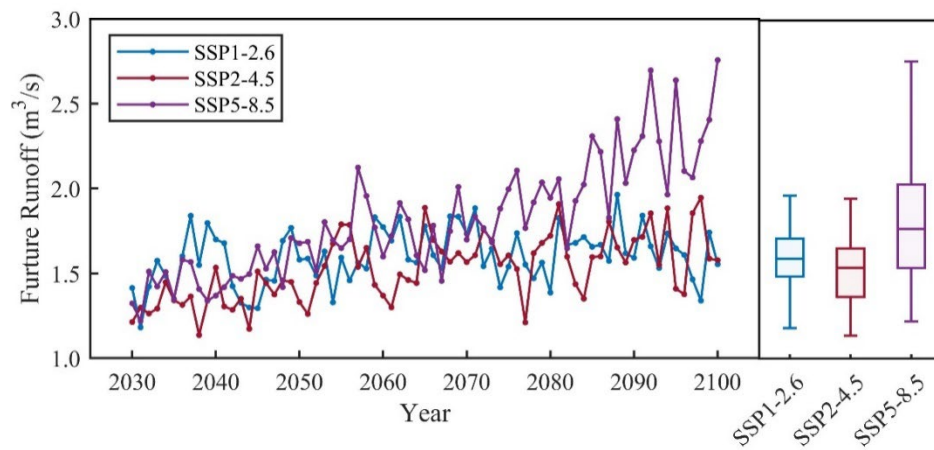

7

8 **Figure S1: Projection of future runoff during 2030–2100 using the original SWAT-**  
 9 **Carbon.** The right subplot represents the annual mean runoff. SSP1-2.6, SSP2-4.5 and SSP5-  
 10 5.8 refer to low emission, moderate and high emissions, respectively, based on the Coupled  
 11 Model Intercomparison Project Phase 6 (CMIP6) multi-model ensemble.

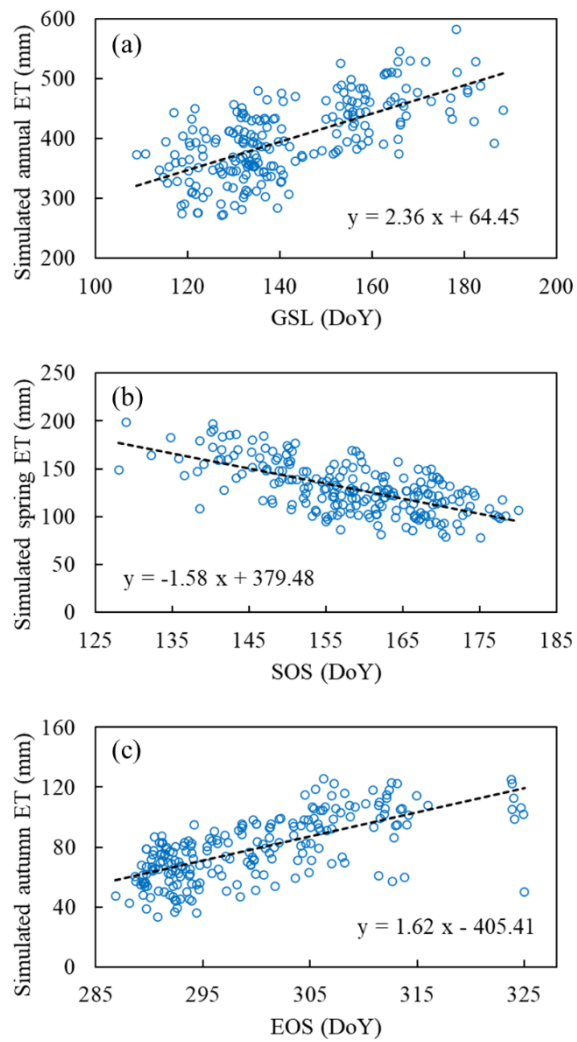

12

13 **Figure S2: Relationship between the phenological variations and sub-basin scales**  
 14 **evapotranspiration (ET) using modified SWAT-Carbon model. GSL, growing season**  
 15 **length; SOS, start-of-season; EOS, end-of-season; ET, evapotranspiration.**

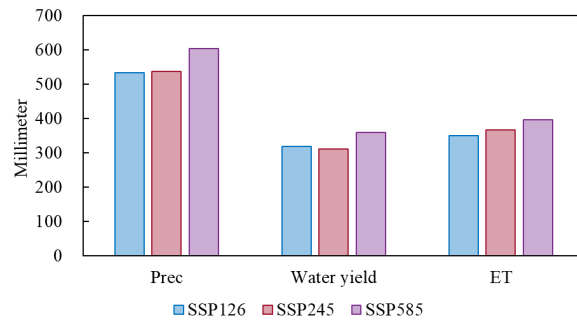

16

17 **Figure S3: Precipitation, simulated water yield, and ET by modified SWAT-Carbon**  
 18 **model from 2030 to 2100 under each emission scenario.**

19 **Table S1:** Summary of the LAI-related parameters controlling vegetation growth and  
 20 initial/calibrated values for forest (FRST) and grassland (PAST).

| Parameter | Definition (unit)                                                                          | Calibration values |       |
|-----------|--------------------------------------------------------------------------------------------|--------------------|-------|
|           |                                                                                            | FRST               | PAST  |
| ALAI_MIN  | Minimum leaf area index (m <sup>2</sup> /m <sup>2</sup> )                                  | 1.099              | 0.287 |
| BLAI      | Maximum potential leaf area index (m <sup>2</sup> /m <sup>2</sup> )                        | 4.012              | 4     |
| DLAI      | Fraction of PHU when LAI begins to decline                                                 | 0.850              | 0.839 |
| FRGRW1    | Fraction of PHU corresponding to the 1st point on the leaf area development curve          | 0.166              | 0.161 |
| FRGRW2    | Fraction of PHU corresponding to the 2nd point on the leaf area development curve          | 0.809              | 0.408 |
| LAIMX1    | Fraction of BLAI corresponding to the 1st point on the optimal leaf area development curve | 0.296              | 0.636 |
| LAIMX2    | Fraction of BLAI corresponding to the 2nd point on the optimal leaf area development curve | 0.472              | 0.984 |
| T_BASE    | Minimum temperature for plant growth (°C)                                                  | 0.855              | 0.006 |

21

22 **Table S2:** Summary of the original and modified SWAT-Carbon models' parameters that  
 23 control runoff with default and calibrated values.

24

| Parameter | Definition (unit)                                                                                       | Scaling type | Range       | Original model |      | Modified model |      |
|-----------|---------------------------------------------------------------------------------------------------------|--------------|-------------|----------------|------|----------------|------|
|           |                                                                                                         |              |             | Value          | Rank | Value          | Rank |
| CN2       | Initial SCS runoff curve number for moisture condition II                                               | multiple     | -0.5 – 0.5  | 0.01           | 1    | -0.12          | 3    |
| SFTMP     | Snowfall temperature (°C)                                                                               | replace      | -5 – 5      | 1.56           | 20   | 1.89           | 5    |
| SMTMP     | Snow melt base temperature (°C)                                                                         | replace      | -5 – 5      | -0.18          | 15   | -4.28          | 17   |
| TIMP      | Snow pack temperature lag factor (°C)                                                                   | relative     | 0 – 1       | 0.30           | 14   | 0.79           | 9    |
| ALPHA_BF  | Baseflow alpha factor (days)                                                                            | replace      | 0 – 1       | 0.72           | 8    | 0.34           | 7    |
| GW_DELAY  | Groundwater delay time (days)                                                                           | replace      | 0 – 500     | 16.60          | 9    | 6.09           | 8    |
| GWQMN     | Threshold depth of water in the shallow aquifer required for return flow to occur (mm H <sub>2</sub> O) | replace      | 0 – 5000    | 1142.72        | 5    | 2882.59        | 10   |
| GW_REVAP  | Groundwater "revap" coefficient                                                                         | relative     | 0.02 – 0.2  | 0.03           | 12   | 0.08           | 21   |
| RCHRG_DP  | Deep aquifer percolation fraction                                                                       | replace      | 0 – 0.5     | 0.44           | 7    | 0.42           | 4    |
| CH_N2     | Manning's "n" value for the main channel                                                                | replace      | 0.25 – 0.14 | 0.05           | 19   | 0.05           | 14   |
| SOL_K     | Saturated hydraulic conductivity (mm/hr)                                                                | multiple     | -0.5 – 0.5  | -0.38          | 3    | -0.31          | 6    |
| SOL_AWC   | Available water capacity of the soil layer (mm H <sub>2</sub> O/mm soil)                                | multiple     | -0.5 – 0.5  | -0.003         | 10   | -0.05          | 16   |
| SOL_BD    | Moist bulk density (g cm <sup>-3</sup> )                                                                | multiple     | -0.5 – 0.5  | 0.25           | 2    | 0.19           | 1    |
| SOL_Z     | Depth from soil surface to bottom of layer (mm)                                                         | multiple     | -0.5 – 0.5  | -0.38          | 13   | 0.19           | 18   |
| HRU_SLP   | Average slope steepness                                                                                 | multiple     | -0.5 – 0.5  | 0.23           | 4    | 0.50           | 2    |
| SLSUBBSN  | Average slope length (m)                                                                                | multiple     | -0.5 – 0.5  | 0.04           | 11   | -0.39          | 12   |
| CANMX     | Maximum canopy storage                                                                                  | replace      | 0 – 15      | 7.86           | 22   | 13.0           | 13   |
| ESCO      | Soil evaporation compensation factor                                                                    | replace      | 0 – 1       | 0.97           | 6    | 0.89           | 11   |

25 **Table S3:** Performance of runoff simulation in different months by modified SWAT-Carbon

| Month              | R <sup>2</sup> |          | NSE      |          |
|--------------------|----------------|----------|----------|----------|
|                    | Original       | Modified | Original | Modified |
| June               | 0.45           | 0.58     | 0        | 0.39     |
| October            | 0.49           | 0.79     | 0.31     | 0.78     |
| Non-growing season | 0.72           | 0.73     | 0.19     | 0.54     |

26
